# Supplementary material for: SF3B4 Regulated Alternative Splicing that Produced an Oncogenic Isoform of HOXA11-AS to Promote Glycolytic Reprogramming and ESCC Progression
Source: Research Square preprint supplement (doi:10.21203/rs.3.rs-3086784/v1), 2023-07-11
Supplement: Supplementary file 1 [file 50b78e1bde59feda9184d3df.doc]

Table S1 Primers for genes involved in the study

| **Gene** | **Forward primer** | **Reverse primer** |
| --- | --- | --- |
| RBM5 | AGTGATAAAACTCCACGAAGG | TGACTATGGTGAGCACGACTA |
| RBM6 | TGTTTTCTGAGGCTGAGGGTA | TATGTCTGCGTGGAGTTTTCA |
| PABPC1 | GAAGGAGGTGCTGGCTGGTAG | GTTATGATGGAGGGTGGTCGC |
| HSPA8 | TCATCAAATCTGCGTCCAATC | ATCAGGGAAACCGAACCACTC |
| SMC1A | CACCAATCTCCCGACAAAACT | CCAAGACACGACATCTAGCCC |
| SF3B3 | TCTGCTGACATCTCCTTCCGT | ACAAGTGGTGATTGCCCTGAC |
| SF3B4 | CGAAGCATCAAATGAAGCAAA | GAAGCCAATACGGGTGAACAA |
| HOXA11-AS-l | GTTTGAAGCCGTGGATGTGC | TGGATCCCGGGTAAGACGAA |
| HOXA11-AS-s | CCATTTAGTGGCGGGCTCAA | TAAGCTCGGCTGTTGGACCT |
| EIF4B-l | ATAGGGCGCCTCCAATTGAC | AGTGTAGGGTGGCGATTTGG |
| EIF4B-s1 | TTACCACGTGAACCCAGCAAT | GGGCATAGCAGAAGCACTCTT |
| EIF4B-s2 | GCAATACCAGTTTCCAGTGTGAT | GCCAGAAAGTCTGTTAGGGAGA |
| MKNK2-l | AAAAGGCAGAGAATCCCCCG | TGCCCCTCCTGAATCTCGTA |
| MKNK2-s | AAAGACCTCACGTCCTTCGC | AAGTGACTGTCCCACCAGGA |
| CDK19-l | GCCAGCTTCGCCTTGAAATC | TCGCTAATGAGCTCGAGGAAG |
| CDK19-s | TCCAACGCTTGAGGTCCATAC | TGTTTGAGTACGAAGGGTGCAA |
| AKT2-l | GTGATGGACTGGGCGGTAAA | TACCGCGACATCAAGGTGC |
| AKT2-s1 | ATGCACACCACATGGGACTC | GCAGTTGACACTCCGCTAGT |
| AKT2-s2 | CGTGGGTCTGGAAGGCATAC | GTGTGTGCAGAATAAGCAGGG |
| OUT-ANXA2-l | CACGGCCCAGGTTATCTTGT | CAGGACCTTATCTCGCGTCC |
| IN-ANXA2-l | CCCGCTTGGTTGAACACATT | CCATATGCACTTGGGGGTGT |
| OUT-ANXA2-s1 | CATTGCTGCGGTTGGTCAAA | TTCCTCCTTCCCATTTCGGC |
| IN-ANXA2-s1 | TCCCGCTCAGCATCAAAGTT | TCAGCAACCGAGAGGAGTCT |
| OUT-ANXA2-s2 | GTTCAAAGCATCCCGCTCAG | CGGTCTCTTTCCACCCACTC |
| IN-ANXA2-s2 | ATCCCGCTCAGCATCAAAGT | TTTGATCGAGGTCACTGGGC |
| GAPDH | AATCCCATCACCATCTTCCAG | CCTTCTCCATGGTGGTGAAGAC |
| β-actin | CTCCATCCTGGCCTCGCTGT | GCTGTCACCTTCACCGTTCC |
