# Supplementary material for: SF3B4 Regulated Alternative Splicing that Produced an Oncogenic Isoform of HOXA11-AS to Promote Glycolytic Reprogramming and ESCC Progression
Source: Research Square preprint supplement (doi:10.21203/rs.3.rs-3086784/v1), 2023-07-11
Supplement: Supplementary file 2 [file 73fc7ccffd8eda038a146cf8.doc]

Table S1 Demographic and clinical parameters of the patients in Cohort 3 of Figure 7

| Patients [N] | 50 |
| --- | --- |
| Age, years (median, quartiles) | 68 (63,72) |
| T stage | T1 (16%), T2 (14%), T3 (76%) |
| N stage | N0 (62%), N1 (24%), N2 (12%), N3(2%) |
| M stage | M0 (100%) |
| Pathological stage | Ⅰ (10%), Ⅱ (58%), Ⅲ (30%), Ⅳ (2%) |
| Clinical stage | Ⅰ (8%), Ⅱ (60%), Ⅲ (32%) |

Note: All patients were staged according to the 8th edition of the tumor/node/metastasis (TNM) staging standards for esophageal and esophageal gastric junction cancer (2017) developed by the Joint Commission on Cancer (AJCC).
