# Supplementary material for: SF3B4 Regulated Alternative Splicing that Produced an Oncogenic Isoform of HOXA11-AS to Promote Glycolytic Reprogramming and ESCC Progression
Source: Research Square preprint supplement (doi:10.21203/rs.3.rs-3086784/v1), 2023-07-11
Supplement: Supplementary file 4 [file 9954485a2422fe5201a92afb.doc]

Table S2 siRNAs targeting the SF3B4 gene

| siRNA | Base sequence |
| --- | --- |
| si-SF1# | Sense: GGA UGA GAA GGU UAG UGA ATT  Antisense: UUC ACU AAC CUU CUC AUC CTT |
| si-SF2# | Sense: GCA CCA AGG CUA UGG CUU UTT  Antisense: AAA GCC AUA GCC UUG GUG CTT |
| Negative control  (NC) | Sense: UUC UCC GAA CGU GUC ACG UTT  Antisense: ACG UGA CAC GUU CGG AGA ATT |
