# Supplementary material for: SF3B4 Regulated Alternative Splicing that Produced an Oncogenic Isoform of HOXA11-AS to Promote Glycolytic Reprogramming and ESCC Progression
Source: Research Square preprint supplement (doi:10.21203/rs.3.rs-3086784/v1), 2023-07-11
Supplement: Supplementary file 5 [file a7d7878b7d76aed2c23804cc.docx]

**Detection of genes or alternative splicing isoforms with real-time fluorescent quantitative PCR ( RT-qPCR) analysis**

Total RNA was isolated from tissues or cells using Trizol reagent (Invitrogen, CA, USA). First-strand cDNA was generated in a 9700 PCR Amplifier (Life Technologies, CA, USA) using MMLV reverse transcriptase (Invitrogen, CA, USA) according to the manufacturer's protocol. qPCR was performed by CFX96™ Real-Time System (BIO-RAD, CA, USA) or QuantStudio Dx Real-Time PCR System (Thermo Fisher Scientific, MA, USA) using SYBR Green premix (Takara, Aichi Ken, Japan). qPCR primers were designed based on conserved sequences specific to genes, exons, or exon-exon junctions (Table S3). GAPDH or β-actin was used as an endogenous control for mRNA and lncRNA. The 2–ΔCt or 2–ΔΔCt value was calculated as the relative expression of RNA.

**Immunochemistry**

Immunohistochemical staining of tissue paraffin sections was performed using anti-SF3B4 antibody (1:100, 10482–1–AP, Proteintech, Wuhan, China), anti–Ki–67 antibody (1:80, 27309–1–AP, Proteintech, Wuhan, China). Image acquisition was performed by ECLIPSE Ti2 inverted microscope (Nikon, Japan). The positive grade of protein expression was judged according to the product of the integral of cell staining intensity and the integral of the number of positive cells.

**Western blot analysis**

Proteins of ESCC cell lines KYSE70, KYSE140, KYSE180 and normal esophageal epithelial immortalized cell line NE were donated by Professor Yongmei Song (State Key Laboratory of Molecular Oncology, Cancer Institute and Cancer Hospital, Chinese Academy of Medical Sciences and Peking Union Medical College). Total proteins of other cells or tissues were prepared using RIPA Lysis Buffer (Solarbio, BJ, China), loaded onto sodium dodecyl sulfate-polyacrylamide gels, and then transferred to nitrocellulose filter membranes. The blots were incubated with anti-SF3B4 antibody (1:2000, 10482–1–AP, Proteintech, Wuhan, China), anti-HK2 antibody (1:2000, 22029–1–AP, Proteintech, Wuhan, China), anti-PKM2 antibody (1:2000, 60268–1–Ig, Proteintech, Wuhan, China), anti-ENO1 antibody (1:2000, 21829–1–AP, Proteintech, Wuhan, China), anti-LDHA antibody (1:2000, 21799–1–AP, Proteintech, Wuhan, China), anti-PGK1 antibody (1:2000, BS6691, Bioworld, MN, USA), anti–GAPDH (1:10000, BS65656, Bioworld, MN, USA) antibody anti-β-actin antibody (1:2000, 20536–1–AP, Proteintech, Wuhan, China), anti-p-β-catenin antibody (1:2000, 80084–1–RR, Proteintech, Wuhan, China), anti-c-Myc antibody (1:1000, #18583, CST, BSN, USA), or anti-Cyclin D1 antibody (1:1000, 60186–1–Ig, Proteintech, Wuhan, China) at 4°C overnight, and then incubated with IRdye 800-conjugated goat anti-rabbit IgG (1:10000, LI-COR, USA) or IRdye 700-conjugated goat anti-mouse IgG (1:10000, LI-COR, USA) for 1 hour at room temperature. Visualization was performed using an Odyssey infrared scanner (LI-COR, USA). GAPDH or β-actin were used as endogenous controls. Gray values of bands were evaluated using Image J software.

**Cell Proliferation, Colony Formation, and Transwell Assays**

For cell proliferation assays, one method is to adjust the baseline in the xCELLigence RTCA MP Analyzer (Agilent, CA, USA) using a 96-well electronic microplate (E-Plate 96) with media. 2 × 103 cells were then seeded, and impedance signals of the E-Plate 96 were detected every 15 minutes for one week. Alternatively, 3 × 103 cells were seeded into 96-well plates and cell proliferation activities were assessed every 24 hours using MTS (Promega, WI, USA) and a MULTISKAN ASCENT microplate reader (Thermo Fisher Scientific, MA, USA) according to the manufacturer's protocol. For colony formation assays, 3 × 103 cells were seeded in 6-well plates and cultured for 10 days. Colonies were fixed and stained with 1% crystal violet, then counted using Image J software. For migration assays, 3 × 105 cells were seeded into the upper chamber and medium containing 30% bovine serum was placed into the lower chamber. The upper chamber was fixed and stained with 1% crystal violet after 20 hours of incubation, then images were acquired using ECLIPSE Ti2 inverted microscope (Nikon, Japan). For invasion assays, 100μl 1mg/ml Matrigel (Solarbio, BJ, China) was plated in the upper chamber before cells being seeded. The upper chamber was fixed and stained after 24 hours of culture.

**Cell cycle and apoptosis assays**

Cells were fixed using 70% ethanol at –20°C, then washed with cold PBS and incubated with PI/RNase Staining Buffer (BD Biosciences, NJ, USA) for 15 minutes at room temperature. Cell cycle was analyzed using BD FACSCalibur (BD Biosciences, NJ, USA). Cells were treated with 50μg/ml cisplatin for 18 hours, and the supernatant and cells were both collected. Cells were washed with cold PBS and treated with FITC Annexin V Apoptosis Detection Kit or PE Annexin V Apoptosis Detection Kit (BD Biosciences, NJ, USA) according to the manufacturer's protocols. Apoptosis was analyzed using BD FACSCalibur (BD Biosciences, NJ, USA).

**Gene (or protein)-set enrichment analysis**

For the enrichment analysises of differentially expressed genes based on GO and KEGG databases, on the one hand, we downloaded the applicable subsets of GO terms from Molecular Signatures Database (DOI: 10.1093/bioinformatics/btr260, http://www.gsea-msigdb.org/gsea/downloads.jsp). On the other hand, the latest KEGG pathway gene annotations were obtained using the KEGG rest API (https://www.kegg.jp/kegg/rest/keggapi.html). These datasets were used as backgrounds where the genes were mapped to. The enrichment analysis was performed using the R software package clusterProfiler (Version 3.14.3). The minimum gene set was set to 5 and the maximum gene was set to 5000. P value < 0.05 and meanwhile FDR < 0.25 were considered statistically significant. The results were visualized using ggplot2 or online tools (http://vip.sangerbox.com/home.html, or https://www.chiplot.online/).

For gene set enrichment analysis (GSEA), we obtained the GSEA software (Version 3.0) from the GSEA ( DOI: 10.1073/pnas.0506580102, http://software. broadinstitute.org/gsea/index.jsp) website. Then, the c2.cp.kegg.v7.4.symbols.gmt subset was downloaded from Molecular Signatures Database (DOI: 10.1093/ bioinformatics/btr260, <http://www.gsea-msigdb.org/gsea/downloads.jsp)> for assessing the relevant pathways and molecular mechanisms. The minimum gene set was set to 5 and the maximum gene was set to 5000. P value < 0.05 and meanwhile FDR < 0.25 were considered statistically significant. The results were visualized using online tools (http://vip.sangerbox.com/home.html).

**Minigene reporter assay**

There are 3 exons in HOXA11-AS, among which exon2 undergo abnormal AS splicing in ESCC cells. A full-length HOXA11-AS plasmid that can mimic HOXA11-AS pre-RNA in *vitro* was ordered from Sangon Biotech Co., Ltd (Shanghai, China). The empty vector is pcDNA 3.1, and the insert is sequentially exon1, 300bp at each end of intron1, exon2, 300bp at each end of intron2, exon3. The construction of mutant HOXA11-AS plasmid adopted the same method, but transformed the 8-mers protein binding motif CCCTGCTG on exon2 into AAAAAAAA. The full-length or mutant HOXA11-AS plasmid, combined with NC or siRNA targeting SF3B4, were used to co-transfect 293T cells. 24 hours later, total RNA was extracted for RT-qPCR analysis.
