# Supplementary material for: SF3B4 Regulated Alternative Splicing that Produced an Oncogenic Isoform of HOXA11-AS to Promote Glycolytic Reprogramming and ESCC Progression
Source: Research Square preprint supplement (doi:10.21203/rs.3.rs-3086784/v1), 2023-07-11
Supplement: Supplementary file 6 [file b89591449f1e573ca8d5aa1d.doc]

Table S2 Demographic and clinical parameters of the patients in the ESCC cohort from TCGA dataset

| Patients [N] | 82 |
| --- | --- |
| Age, years  (median, quartiles) | 58 (56, 60) |
| T stage | T1 (10%), T2 (33%), T3 (50%), T4/NA (4%) |
| N stage | N0 (56%), N1 (32%), N2 (6%), N3/Nx (1%), NA (4%) |
| M stage | M0 (85%), M1 (4%), Mx (6%), NA (5%) |
| Pathological stage | Ⅰ (9%), Ⅱ (57%), Ⅲ (27%), Ⅳ/NA (4%) |
